# Supplementary material for: Fractional Exhaled Nitric Oxide (FeNO) in Patients with Stable Chronic Obstructive Pulmonary Disease: Short-Term Variability and Potential Clinical Implications
Source: MDPI journal article supplement (doi:10.3390/jpm12111906), 2022-11-16
Supplement: s1 [file s1]

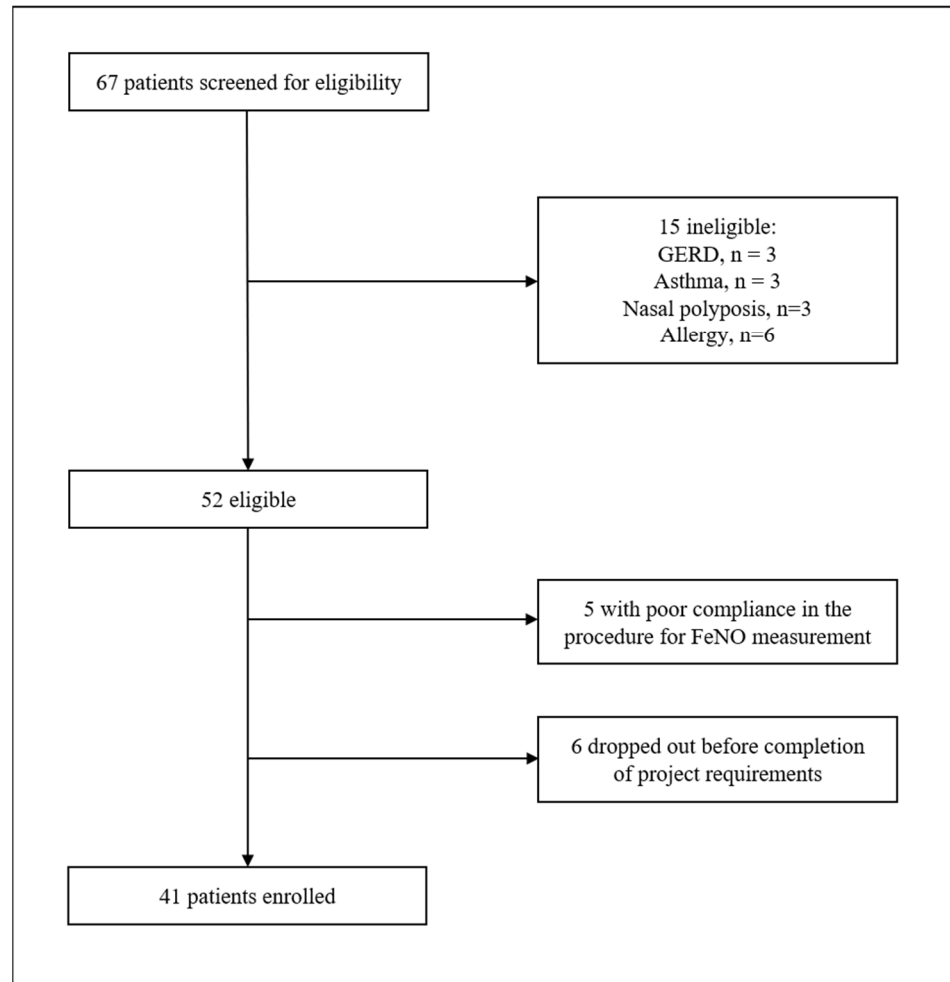

**Supplemental Figure S1.** Flow chart of study participants. GERD: gastroesophageal reflux disease.
